# Supplementary material
Source: Springer Nature journal article supplement (https://www.springermedizin.de/resource/supplementary/12885_2011_2892_MOESM7_ESM.pdf/9462218)

**A**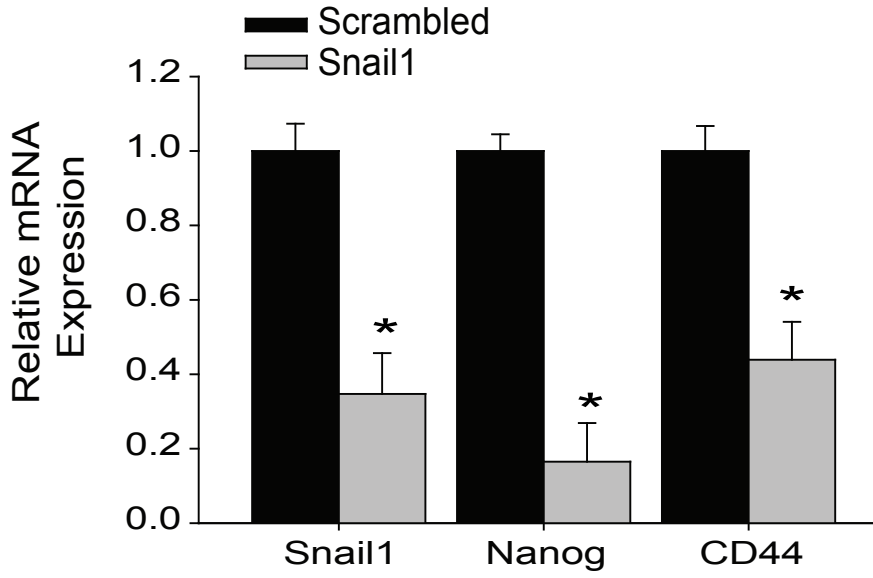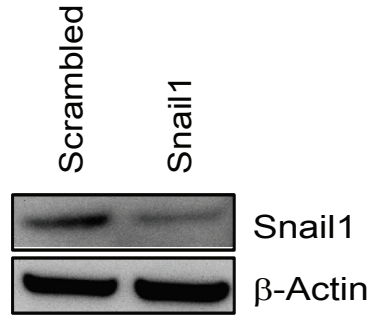**B**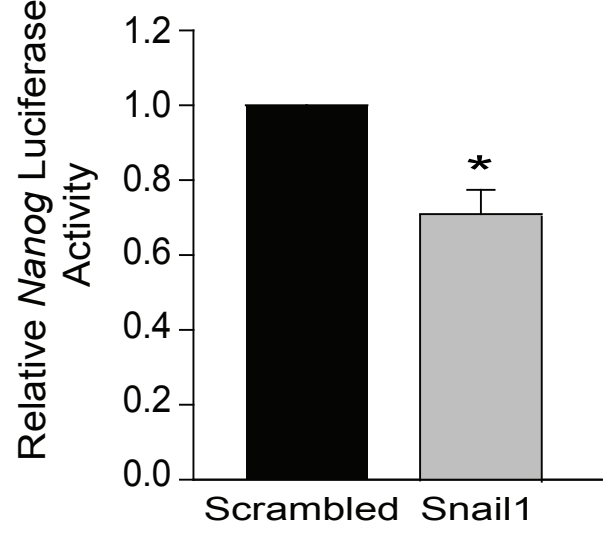**C**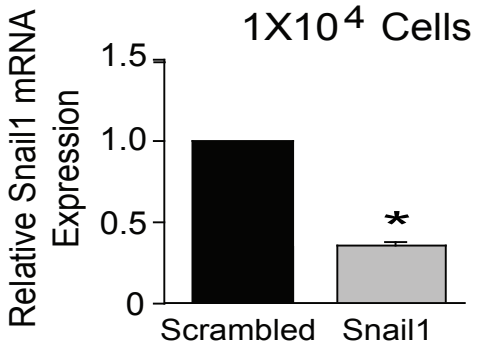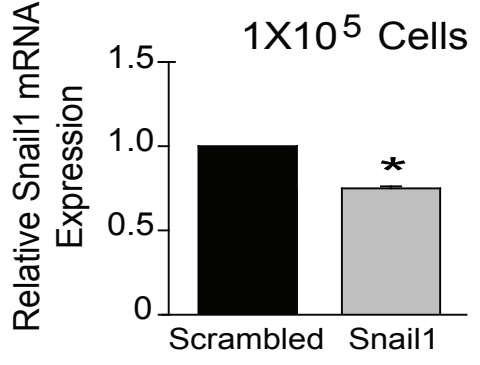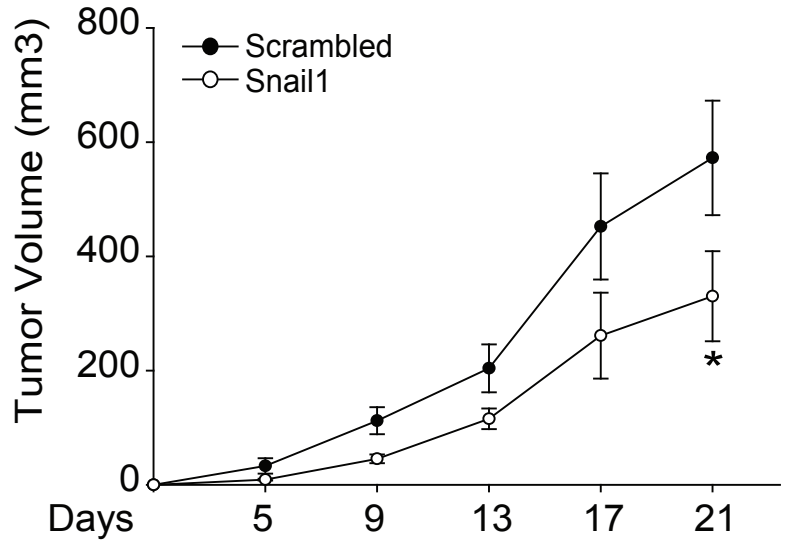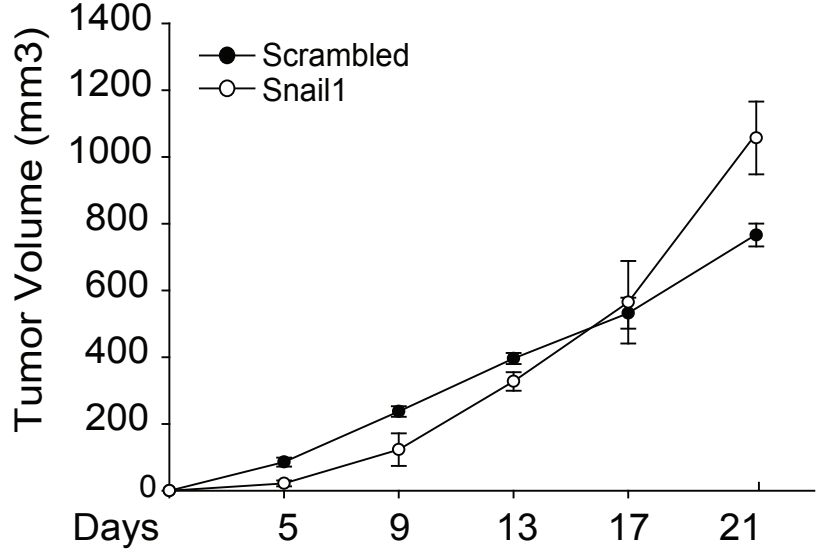

Supplement: MOESM7 [file 9462218]
